# Supplementary material
Source: publisher figshare collection journal article supplement (https://gsajournals.figshare.com/ndownloader/files/13192313)
Supplement: Supplementary file 1 [file 13192313]

## Sheet: information
SUPPA significant exitron splicing events (p-value < 0.01 and absolute dPSI >= 0.1)
	Total	PSI up	PSI down
sac3a	42	31	11
prp4ka	44	35	9

## Sheet: sac3a
Gene ID	Event identifier	dPSI	p-value	description	comp_description	IPR_domain
AT1G02850	EI:1:631858-632000:+	0.354073	0	beta glucosidase 11	beta glucosidase 11 (BGLU11); FUNCTIONS IN: cation binding, hydrolase activity, hydrolyzing O-glycosyl compounds, catalytic activity; INVOLVED IN: carbohydrate metabolic process; LOCATED IN: endomembrane system; EXPRESSED IN: 24 plant structures; EXPRESSED DURING: 13 growth stages; CONTAINS InterPro DOMAIN/s: Glycoside hydrolase, family 1 (InterPro:IPR001360), Glycoside hydrolase, family 1, activ…	Glycoside hydrolase, catalytic domain | Glycoside hydrolase, family 1 | Glycoside hydrolase, family 1, active site | Glycoside hydrolase, superfamily
AT1G02850	EI:1:631858-632009:+	0.354073	0
AT1G14170	EI:1:4845150-4845226:-	-0.177402	0.00549451	RNA-binding KH domain-containing protein	RNA-binding KH domain-containing protein; FUNCTIONS IN: RNA binding, nucleic acid binding; INVOLVED IN: biological_process unknown; LOCATED IN: cellular_component unknown; CONTAINS InterPro DOMAIN/s: K Homology (InterPro:IPR004087), K Homology, type 1, subgroup (InterPro:IPR018111), K Homology, type 1 (InterPro:IPR004088); CONTAINS InterPro DOMAIN/s: K Homology, type 1, subgroup (InterPro:IPR0181…	K Homology domain | K Homology domain, type 1
AT1G14560	EI:1:4981841-4981925:+	-0.180524	0.0014985	Mitochondrial substrate carrier family protein	Mitochondrial substrate carrier family protein; FUNCTIONS IN: binding, transporter activity; INVOLVED IN: transport, mitochondrial transport, transmembrane transport; LOCATED IN: endomembrane system, mitochondrial inner membrane, membrane; EXPRESSED IN: 24 plant structures; EXPRESSED DURING: 14 growth stages; CONTAINS InterPro DOMAIN/s: Mitochondrial carrier protein (InterPro:IPR002067), Mitochon…	Graves disease carrier protein | Mitochondrial carrier domain | Mitochondrial carrier protein | Mitochondrial substrate/solute carrier
AT1G14560	EI:1:4981841-4981931:+	-0.180524	0.0014985
AT1G65040	EI:1:24162882-24162952:-	0.172049	0.002997	RING/U-box superfamily protein	RING/U-box superfamily protein; FUNCTIONS IN: zinc ion binding; LOCATED IN: plasma membrane; EXPRESSED IN: male gametophyte, pollen tube; EXPRESSED DURING: L mature pollen stage, M germinated pollen stage; CONTAINS InterPro DOMAIN/s: Zinc finger, RING-type (InterPro:IPR001841), Zinc finger, C3HC4 RING-type (InterPro:IPR018957); BEST Arabidopsis thaliana protein match is: RING/U-box superfamily pr…	Zinc finger, RING-type | Zinc finger, RING/FYVE/PHD-type
AT1G66980	EI:1:25000347-25000469:-	0.21566	0	suppressor of npr1-1 constitutive 4	suppressor of npr1-1 constitutive 4 (SNC4); CONTAINS InterPro DOMAIN/s: Protein kinase, ATP binding site (InterPro:IPR017441), Serine/threonine-protein kinase domain (InterPro:IPR002290), Serine-threonine/tyrosine-protein kinase (InterPro:IPR001245), Protein kinase-like domain (InterPro:IPR011009), Serine/threonine-protein kinase, active site (InterPro:IPR008271), PLC-like phosphodiesterase, TIM …	Concanavalin A-like lectin/glucanase, subgroup | Glycerophosphoryl diester phosphodiesterase | PLC-like phosphodiesterase, TIM beta/alpha-barrel domain | Protein kinase domain | Protein kinase, ATP binding site | Protein kinase-like domain | Serine-threonine/tyrosine-protein kinase catalytic domain | Serine/threonine-protein kinase, active site
AT1G69450	EI:1:26107618-26107700:-	-0.285654	0	Early-responsive to dehydration stress protein (ERD4)	Early-responsive to dehydration stress protein (ERD4); LOCATED IN: endomembrane system, membrane; EXPRESSED IN: 23 plant structures; EXPRESSED DURING: 13 growth stages; CONTAINS InterPro DOMAIN/s: Protein of unknown function DUF221 (InterPro:IPR003864); BEST Arabidopsis thaliana protein match is: hypothetical protein 1 (TAIR:AT3G01100.1)	Domain of unknown function DUF221
AT1G77080	EI:1:28958663-28958745:+	0.145529	0.0024975	K-box region and MADS-box transcription factor family protein	K-box region and MADS-box transcription factor family protein ; MADS AFFECTING FLOWERING 1 (MAF1); FUNCTIONS IN: sequence-specific DNA binding transcription factor activity; INVOLVED IN: photoperiodism, flowering, negative regulation of flower development, regulation of transcription, DNA-dependent, regulation of flower development; LOCATED IN: nucleus; EXPRESSED IN: 24 plant structures; EXPRESSE…	Transcription factor, K-box | Transcription factor, MADS-box
AT1G79620	EI:1:29959839-29959918:-	0.268575	0.001998	Leucine-rich repeat protein kinase family protein	Leucine-rich repeat protein kinase family protein; FUNCTIONS IN: protein serine/threonine kinase activity, kinase activity, ATP binding; INVOLVED IN: transmembrane receptor protein tyrosine kinase signaling pathway, protein amino acid phosphorylation; LOCATED IN: endomembrane system; EXPRESSED IN: 8 plant structures; EXPRESSED DURING: 4 anthesis, petal differentiation and expansion stage; CONTAIN…	Concanavalin A-like lectin/glucanase, subgroup | Leucine-rich repeat | Leucine-rich repeat-containing N-terminal, type 2 | Protein kinase domain | Protein kinase, ATP binding site | Protein kinase-like domain | Serine-threonine/tyrosine-protein kinase catalytic domain | Serine/threonine-protein kinase, active site
AT1G79710	EI:1:29996683-29996829:+	-0.226781	0.0034965	Major facilitator superfamily protein	Major facilitator superfamily protein; CONTAINS InterPro DOMAIN/s: Major facilitator superfamily, general substrate transporter (InterPro:IPR016196), Biopterin transport-related protein BT1 (InterPro:IPR004324); BEST Arabidopsis thaliana protein match is: Major facilitator superfamily protein (TAIR:AT5G25050.1)	Biopterin transport-related protein BT1 | Major facilitator superfamily domain, general substrate transporter
AT1G79790	EI:1:30017442-30017518:-	0.13205	0.002997	Haloacid dehalogenase-like hydrolase (HAD) superfamily protein	Haloacid dehalogenase-like hydrolase (HAD) superfamily protein; FUNCTIONS IN: hydrolase activity; LOCATED IN: chloroplast; EXPRESSED IN: 23 plant structures; EXPRESSED DURING: 13 growth stages; CONTAINS InterPro DOMAIN/s: HAD-superfamily hydrolase, subfamily IA, variant 3 (InterPro:IPR006402)	HAD hydrolase, subfamily IA | HAD-like domain
AT2G05380	EI:2:1967635-1967678:+	0.115315	0.00999001	glycine-rich protein 3 short isoform	glycine-rich protein 3 short isoform (GRP3S); FUNCTIONS IN: molecular_function unknown; INVOLVED IN: biological_process unknown; LOCATED IN: endomembrane system; EXPRESSED IN: 16 plant structures; EXPRESSED DURING: 13 growth stages; CONTAINS InterPro DOMAIN/s: Glycine rich protein (InterPro:IPR010800); BEST Arabidopsis thaliana protein match is: glycine-rich protein 3 (TAIR:AT2G05520.5); BEST Ara…	Glycine rich protein
AT2G05440	EI:2:1993744-1993766:+	0.132451	0.0044955	GLYCINE RICH PROTEIN 9	GLYCINE RICH PROTEIN 9 (GRP9); FUNCTIONS IN: molecular_function unknown; INVOLVED IN: biological_process unknown; LOCATED IN: endomembrane system; CONTAINS InterPro DOMAIN/s: Glycine rich protein (InterPro:IPR010800); BEST Arabidopsis thaliana protein match is: Glycine-rich protein family (TAIR:AT2G05510.1); BEST Arabidopsis thaliana protein match is: Glycine-rich protein family (TAIR:AT2G05510.2…	Glycine rich protein
AT2G05440	EI:2:1993744-1993787:+	0.106098	0.00999001
AT2G05440	EI:2:1993807-1993877:+	-0.11778	0.00649351
AT2G21660	EI:2:9265484-9265707:-	-0.209745	0.003996	cold, circadian rhythm, and rna binding 2	cold, circadian rhythm, and rna binding 2 (CCR2); GLYCINE RICH PROTEIN 7 (ATGRP7); FUNCTIONS IN: double-stranded DNA binding, RNA binding, single-stranded DNA binding; INVOLVED IN: in 12 processes; LOCATED IN: nucleus, chloroplast, peroxisome, cytoplasm; EXPRESSED IN: 27 plant structures; EXPRESSED IN: 28 plant structures; EXPRESSED DURING: 15 growth stages; CONTAINS InterPro DOMAIN/s: RNA recogn…	Nucleotide-binding, alpha-beta plait | RNA recognition motif domain
AT2G21660	EI:2:9265484-9265716:-	-0.209745	0.003996
AT2G21660	EI:2:9265484-9265728:-	0.117552	0.00949051
AT2G22330	EI:2:9488672-9488962:+	0.123673	0.00899101	cytochrome P450, family 79, subfamily B, polypeptide 3	cytochrome P450, family 79, subfamily B, polypeptide 3 (CYP79B3); FUNCTIONS IN: electron carrier activity, monooxygenase activity, iron ion binding, oxygen binding, heme binding; INVOLVED IN: in 10 processes; LOCATED IN: chloroplast; EXPRESSED IN: 24 plant structures; EXPRESSED DURING: 12 growth stages; CONTAINS InterPro DOMAIN/s: Cytochrome P450 (InterPro:IPR001128), Cytochrome P450, E-class, gr…	Cytochrome P450 | Cytochrome P450, E-class, group I | Cytochrome P450, conserved site
AT2G25590	EI:2:10891382-10891453:+	0.14766	0.003996	Plant Tudor-like protein	Plant Tudor-like protein; FUNCTIONS IN: RNA binding; INVOLVED IN: biological_process unknown; EXPRESSED IN: 24 plant structures; EXPRESSED DURING: 14 growth stages; CONTAINS InterPro DOMAIN/s: Tudor-like, plant (InterPro:IPR014002), Agenet (InterPro:IPR008395); BEST Arabidopsis thaliana protein match is: Plant Tudor-like RNA-binding protein (TAIR:AT4G32440.3)	Agenet-like domain | Tudor-like, plant
AT2G36120	EI:2:15165714-15166147:+	-0.281789	0	Glycine-rich protein family	DEFECTIVELY ORGANIZED TRIBUTARIES 1 (DOT1); INVOLVED IN: cotyledon vascular tissue pattern formation, phloem or xylem histogenesis, leaf vascular tissue pattern formation, leaf development; LOCATED IN: endomembrane system; EXPRESSED IN: 9 plant structures; EXPRESSED DURING: LP.06 six leaves visible, LP.04 four leaves visible, LP.10 ten leaves visible, petal differentiation and expansion stage
AT2G39340	EI:2:16425150-16425246:+	0.149647	0.0044955	SAC3/GANP/Nin1/mts3/eIF-3 p25 family	SAC3/GANP/Nin1/mts3/eIF-3 p25 family; CONTAINS InterPro DOMAIN/s: SAC3/GANP/Nin1/mts3/eIF-3 p25 (InterPro:IPR005062)	SAC3/GANP/Nin1/mts3/eIF-3 p25
AT2G43610	EI:2:18088982-18089125:-	-0.202528	0.000999001	Chitinase family protein	Chitinase family protein; FUNCTIONS IN: chitin binding, chitinase activity; INVOLVED IN: carbohydrate metabolic process, cell wall macromolecule catabolic process; LOCATED IN: plasma membrane; EXPRESSED IN: 15 plant structures; EXPRESSED DURING: 7 growth stages; CONTAINS InterPro DOMAIN/s: Chitin-binding, type 1, conserved site (InterPro:IPR018371), Glycoside hydrolase, family 19 (InterPro:IPR016…	Chitin-binding, type 1 | Chitin-binding, type 1, conserved site | Glycoside hydrolase, family 19 | Glycoside hydrolase, family 19, catalytic | Lysozyme-like domain
AT2G46370	EI:2:19034377-19034544:+	0.129723	0.00649351	Auxin-responsive GH3 family protein	JASMONATE RESISTANT 1 (JAR1); FUNCTIONS IN: catalytic activity, adenylyltransferase activity, ATP binding, jasmonate-amino synthetase activity; INVOLVED IN: in 13 processes; LOCATED IN: cytoplasm; LOCATED IN: vacuole, cytoplasm; EXPRESSED IN: 24 plant structures; EXPRESSED DURING: 13 growth stages; CONTAINS InterPro DOMAIN/s: GH3 auxin-responsive promoter (InterPro:IPR004993); BEST Arabidopsis th…	GH3 auxin-responsive promoter
AT3G12520	EI:3:3971825-3971874:-	0.160632	0.00649351	sulfate transporter 4;2	sulfate transporter 4;2 (SULTR4;2); FUNCTIONS IN: sulfate transmembrane transporter activity; INVOLVED IN: sulfate transport, transport, transmembrane transport; LOCATED IN: integral to membrane, membrane; EXPRESSED IN: 22 plant structures; EXPRESSED DURING: 13 growth stages; CONTAINS InterPro DOMAIN/s: Sulphate transporter (InterPro:IPR011547), Sulphate transporter/antisigma-factor antagonist ST…	STAS domain | Sulphate anion transporter | Sulphate anion transporter, conserved site | Sulphate transporter
AT3G13290	EI:3:4297544-4297629:+	0.157464	0.00699301	varicose-related	varicose-related (VCR); FUNCTIONS IN: nucleotide binding; LOCATED IN: cellular_component unknown; EXPRESSED IN: male gametophyte, cultured cell, pollen tube; EXPRESSED DURING: L mature pollen stage, M germinated pollen stage; CONTAINS InterPro DOMAIN/s: WD40 repeat-like-containing domain (InterPro:IPR011046), WD40 repeat 2 (InterPro:IPR019782), WD40-repeat-containing domain (InterPro:IPR017986), …	WD40 repeat | WD40-repeat-containing domain | WD40/YVTN repeat-like-containing domain
AT3G21250	EI:3:7461603-7461693:-	0.295761	0	multidrug resistance-associated protein 6	multidrug resistance-associated protein 6 (MRP6); CONTAINS InterPro DOMAIN/s: ATPase, AAA+ type, core (InterPro:IPR003593), ABC transporter-like (InterPro:IPR003439), ABC transporter integral membrane type 1 (InterPro:IPR017940), ABC transporter, transmembrane domain, type 1 (InterPro:IPR011527), ABC transporter, transmembrane domain (InterPro:IPR001140), ABC transporter, conserved site (InterPro…	AAA+ ATPase domain | ABC transporter type 1, transmembrane domain | ABC transporter, conserved site | ABC transporter, transmembrane domain | ABC transporter-like | P-loop containing nucleoside triphosphate hydrolase
AT3G27320	EI:3:10090592-10090685:+	0.126352	0.00549451	alpha/beta-Hydrolases superfamily protein	alpha/beta-Hydrolases superfamily protein; FUNCTIONS IN: hydrolase activity; INVOLVED IN: metabolic process; EXPRESSED IN: 22 plant structures; EXPRESSED DURING: 13 growth stages; CONTAINS InterPro DOMAIN/s: Alpha/beta hydrolase fold-3 (InterPro:IPR013094); BEST Arabidopsis thaliana protein match is: carboxyesterase 16 (TAIR:AT5G14310.1)	Alpha/Beta hydrolase fold | Alpha/beta hydrolase fold-3
AT3G27320	EI:3:10090592-10090689:+	0.126352	0.00549451
AT3G29630	EI:3:11447827-11447906:-	-0.640765	0.0044955	UDP-Glycosyltransferase superfamily protein	UDP-Glycosyltransferase superfamily protein; FUNCTIONS IN: transferase activity, transferring hexosyl groups, transferase activity, transferring glycosyl groups; INVOLVED IN: metabolic process; LOCATED IN: cellular_component unknown; EXPRESSED IN: inflorescence meristem, hypocotyl, root, flower, guard cell; EXPRESSED DURING: petal differentiation and expansion stage; CONTAINS InterPro DOMAIN/s: U…	UDP-glucuronosyl/UDP-glucosyltransferase
AT3G50380	EI:3:18698338-18698590:-	0.203082	0.0024975	Protein of unknown function (DUF1162)	INVOLVED IN: protein localization; LOCATED IN: mitochondrion; EXPRESSED IN: 22 plant structures; EXPRESSED DURING: 13 growth stages; CONTAINS InterPro DOMAIN/s: Vacuolar protein sorting-associated protein (InterPro:IPR009543)	Vacuolar protein sorting-associated protein 13 | Vacuolar protein sorting-associated protein 13 domain
AT4G03230	EI:4:1422335-1422420:-	0.37131	0	S-locus lectin protein kinase family protein	S-locus lectin protein kinase family protein; FUNCTIONS IN: sugar binding, protein serine/threonine kinase activity, protein kinase activity, kinase activity, ATP binding; INVOLVED IN: protein amino acid phosphorylation, recognition of pollen; LOCATED IN: endomembrane system; EXPRESSED IN: 9 plant structures; EXPRESSED DURING: 4 anthesis, F mature embryo stage, petal differentiation and expansion…
AT4G03230	EI:4:1422524-1422632:-	0.415356	0
AT4G11830	EI:4:7119481-7119578:-	0.318625	0.000499501	phospholipase D gamma 2	phospholipase D gamma 2 (PLDGAMMA2); FUNCTIONS IN: phospholipase D activity; INVOLVED IN: phospholipid catabolic process; LOCATED IN: cytosolic ribosome, chloroplast; EXPRESSED IN: 23 plant structures; EXPRESSED DURING: 13 growth stages; CONTAINS InterPro DOMAIN/s: C2 membrane targeting protein (InterPro:IPR018029), C2 calcium/lipid-binding domain, CaLB (InterPro:IPR008973), Phospholipase D (Inte…	C2 domain | Phospholipase D family | Phospholipase D, C-terminal | Phospholipase D, plant | Phospholipase D/Transphosphatidylase
AT4G11840	EI:4:7125245-7125336:-	0.236194	0.000999001	phospholipase D gamma 3	phospholipase D gamma 3 (PLDGAMMA3); FUNCTIONS IN: phospholipase D activity; INVOLVED IN: phosphatidylcholine metabolic process, metabolic process; LOCATED IN: membrane; EXPRESSED IN: 22 plant structures; EXPRESSED DURING: 13 growth stages; CONTAINS InterPro DOMAIN/s: C2 membrane targeting protein (InterPro:IPR018029), C2 calcium/lipid-binding domain, CaLB (InterPro:IPR008973), Phospholipase D (I…	C2 domain | Phospholipase D family | Phospholipase D, C-terminal | Phospholipase D, plant | Phospholipase D/Transphosphatidylase
AT4G19500	EI:4:10627381-10627468:+	0.127136	0.00799201	nucleoside-triphosphatases;transmembrane receptors;nucleotide binding;ATP binding	nucleoside-triphosphatases;transmembrane receptors;nucleotide binding;ATP binding; FUNCTIONS IN: transmembrane receptor activity, ATP binding; FUNCTIONS IN: transmembrane receptor activity, nucleoside-triphosphatase activity, nucleotide binding, ATP binding; INVOLVED IN: signal transduction, defense response, apoptosis, innate immune response; LOCATED IN: intrinsic to membrane; EXPRESSED IN: 23 p…	AAA+ ATPase domain | Domain of unknown function DUF640 | Leucine rich repeat 4 | Leucine-rich repeat 3 | NB-ARC | P-loop containing nucleoside triphosphate hydrolase | Toll/interleukin-1 receptor homology (TIR) domain
AT4G23250	EI:4:12162751-12162830:-	0.348251	0	kinases;protein kinases	EMBRYO DEFECTIVE 1290 (EMB1290); FUNCTIONS IN: protein kinase activity, kinase activity; INVOLVED IN: protein amino acid autophosphorylation, embryo development ending in seed dormancy; LOCATED IN: plasma membrane; EXPRESSED IN: stem; CONTAINS InterPro DOMAIN/s: Protein kinase, ATP binding site (InterPro:IPR017441), Serine/threonine-protein kinase domain (InterPro:IPR002290), Protein of unknown f…
AT4G36690	EI:4:17295297-17295398:-	0.109158	0.00699301	U2 snRNP auxilliary factor, large subunit, splicing factor	ATU2AF65A; FUNCTIONS IN: RNA binding, nucleotide binding, nucleic acid binding; INVOLVED IN: nuclear mRNA splicing, via spliceosome; INVOLVED IN: nuclear mRNA splicing, via spliceosome, defense response to bacterium; LOCATED IN: nucleus; EXPRESSED IN: 25 plant structures; EXPRESSED DURING: 15 growth stages; CONTAINS InterPro DOMAIN/s: RNA recognition motif, RNP-1 (InterPro:IPR000504), Nucleotide-…	Nucleotide-binding, alpha-beta plait | RNA recognition motif domain | U2 snRNP auxilliary factor, large subunit, splicing factor
AT4G39260	EI:4:18274185-18274399:-	0.163703	0.00549451	cold, circadian rhythm, and RNA binding 1	cold, circadian rhythm, and RNA binding 1 (CCR1); FUNCTIONS IN: RNA binding, nucleotide binding, nucleic acid binding; INVOLVED IN: response to zinc ion, response to salt stress, response to cold, circadian rhythm, innate immune response; LOCATED IN: nucleolus, cell wall, peroxisome, plasma membrane, chloroplast; EXPRESSED IN: 27 plant structures; EXPRESSED IN: 28 plant structures; EXPRESSED DURI…	Nucleotide-binding, alpha-beta plait | RNA recognition motif domain
AT5G07940	EI:5:2536468-2536592:+	0.143455	0.00599401		FUNCTIONS IN: molecular_function unknown; INVOLVED IN: biological_process unknown; LOCATED IN: cellular_component unknown; EXPRESSED IN: pollen tube; BEST Arabidopsis thaliana protein match is: dentin sialophosphoprotein-related (TAIR:AT5G07980.1)
AT5G46470	EI:5:18844142-18844225:+	0.16129	0.0024975	disease resistance protein (TIR-NBS-LRR class) family	RESISTANT TO P. SYRINGAE 6 (RPS6); FUNCTIONS IN: transmembrane receptor activity, nucleoside-triphosphatase activity, nucleotide binding, ATP binding; INVOLVED IN: defense response to bacterium, defense response; LOCATED IN: intrinsic to membrane; EXPRESSED IN: 22 plant structures; EXPRESSED DURING: 13 growth stages; CONTAINS InterPro DOMAIN/s: ATPase, AAA+ type, core (InterPro:IPR003593), NB-ARC…	AAA+ ATPase domain | Leucine-rich repeat | Leucine-rich repeat 3 | NB-ARC | P-loop containing nucleoside triphosphate hydrolase | Toll/interleukin-1 receptor homology (TIR) domain

## Sheet: prp4ka
Gene ID	Event identifier	dPSI	p-value	description	comp_description	IPR_domain
AT1G03210	EI:1:783596-783681:+	0.308726	0	Phenazine biosynthesis PhzC/PhzF protein	Phenazine biosynthesis PhzC/PhzF protein; FUNCTIONS IN: catalytic activity; INVOLVED IN: biosynthetic process; LOCATED IN: endomembrane system; EXPRESSED IN: 24 plant structures; EXPRESSED DURING: 15 growth stages; CONTAINS InterPro DOMAIN/s: Phenazine biosynthesis PhzC/PhzF protein (InterPro:IPR003719); BEST Arabidopsis thaliana protein match is: Phenazine biosynthesis PhzC/PhzF protein (TAIR:AT…	Phenazine biosynthesis PhzF protein
AT1G31290	EI:1:11188341-11188564:+	-0.245543	0.00849151	ARGONAUTE 3	ARGONAUTE 3 (AGO3); FUNCTIONS IN: nucleic acid binding; INVOLVED IN: biological_process unknown; LOCATED IN: cellular_component unknown; EXPRESSED IN: 11 plant structures; EXPRESSED DURING: LP.06 six leaves visible, LP.04 four leaves visible, 4 anthesis, C globular stage, petal differentiation and expansion stage; CONTAINS InterPro DOMAIN/s: Domain of unknown function DUF1785 (InterPro:IPR014811)…	Domain of unknown function DUF1785 | PAZ domain | Ribonuclease H-like domain | Stem cell self-renewal protein Piwi
AT1G31500	EI:1:11275957-11276060:-	0.516023	0	DNAse I-like superfamily protein	DNAse I-like superfamily protein; FUNCTIONS IN: hydrolase activity; INVOLVED IN: biological_process unknown; LOCATED IN: cellular_component unknown; EXPRESSED IN: 22 plant structures; EXPRESSED DURING: 13 growth stages; CONTAINS InterPro DOMAIN/s: Endonuclease/exonuclease/phosphatase (InterPro:IPR005135); BEST Arabidopsis thaliana protein match is: DNAse I-like superfamily protein (TAIR:AT1G31530…	Endonuclease/exonuclease/phosphatase
AT1G50120	EI:1:18565175-18565266:+	0.140231	0.0014985		FUNCTIONS IN: molecular_function unknown; INVOLVED IN: biological_process unknown; LOCATED IN: cellular_component unknown; EXPRESSED IN: 23 plant structures; EXPRESSED DURING: 13 growth stages; CONTAINS InterPro DOMAIN/s: Rgp1 (InterPro:IPR014848), Immunoglobulin E-set (InterPro:IPR014756)	Immunoglobulin E-set | Reduced growth phenotype protein 1
AT1G53250	EI:1:19857843-19857948:+	0.107707	0.00649351		unknown protein; BEST Arabidopsis thaliana protein match is: unknown protein (TAIR:AT1G53800.1)
AT1G66980	EI:1:25000347-25000469:-	0.16134	0.00749251	suppressor of npr1-1 constitutive 4	suppressor of npr1-1 constitutive 4 (SNC4); CONTAINS InterPro DOMAIN/s: Protein kinase, ATP binding site (InterPro:IPR017441), Serine/threonine-protein kinase domain (InterPro:IPR002290), Serine-threonine/tyrosine-protein kinase (InterPro:IPR001245), Protein kinase-like domain (InterPro:IPR011009), Serine/threonine-protein kinase, active site (InterPro:IPR008271), PLC-like phosphodiesterase, TIM …	Concanavalin A-like lectin/glucanase, subgroup | Glycerophosphoryl diester phosphodiesterase | PLC-like phosphodiesterase, TIM beta/alpha-barrel domain | Protein kinase domain | Protein kinase, ATP binding site | Protein kinase-like domain | Serine-threonine/tyrosine-protein kinase catalytic domain | Serine/threonine-protein kinase, active site
AT1G66980	EI:1:25000381-25000469:-	0.109241	0.002997
AT1G68190	EI:1:25559561-25559665:+	-0.135225	0.0044955	B-box zinc finger family protein	B-box zinc finger family protein; FUNCTIONS IN: sequence-specific DNA binding transcription factor activity, zinc ion binding; INVOLVED IN: regulation of transcription; LOCATED IN: endomembrane system, intracellular; EXPRESSED IN: 14 plant structures; EXPRESSED DURING: 8 growth stages; CONTAINS InterPro DOMAIN/s: Zinc finger, B-box (InterPro:IPR000315); BEST Arabidopsis thaliana protein match is:…	Zinc finger, B-box
AT1G68190	EI:1:25559561-25559668:+	-0.135225	0.0044955
AT1G77080	EI:1:28958663-28958745:+	-0.111636	0.00499501	K-box region and MADS-box transcription factor family protein	K-box region and MADS-box transcription factor family protein ; MADS AFFECTING FLOWERING 1 (MAF1); FUNCTIONS IN: sequence-specific DNA binding transcription factor activity; INVOLVED IN: photoperiodism, flowering, negative regulation of flower development, regulation of transcription, DNA-dependent, regulation of flower development; LOCATED IN: nucleus; EXPRESSED IN: 24 plant structures; EXPRESSE…	Transcription factor, K-box | Transcription factor, MADS-box
AT1G79790	EI:1:30017442-30017518:-	0.215206	0.001998	Haloacid dehalogenase-like hydrolase (HAD) superfamily protein	Haloacid dehalogenase-like hydrolase (HAD) superfamily protein; FUNCTIONS IN: hydrolase activity; LOCATED IN: chloroplast; EXPRESSED IN: 23 plant structures; EXPRESSED DURING: 13 growth stages; CONTAINS InterPro DOMAIN/s: HAD-superfamily hydrolase, subfamily IA, variant 3 (InterPro:IPR006402)	HAD hydrolase, subfamily IA | HAD-like domain
AT2G02450	EI:2:650395-650501:+	0.121511	0.00949051	NAC domain containing protein 35	LONG VEGETATIVE PHASE 1 (LOV1); NAC domain containing protein 35 (NAC035); FUNCTIONS IN: sequence-specific DNA binding transcription factor activity; INVOLVED IN: multicellular organismal development, regulation of transcription; LOCATED IN: cellular_component unknown; EXPRESSED IN: 18 plant structures; EXPRESSED DURING: 12 growth stages; CONTAINS InterPro DOMAIN/s: No apical meristem (NAM) prote…	NAC domain
AT2G21830	EI:2:9305408-9305492:+	0.153618	0.00549451	Cysteine/Histidine-rich C1 domain family protein	Cysteine/Histidine-rich C1 domain family protein; FUNCTIONS IN: zinc ion binding; INVOLVED IN: intracellular signaling pathway; EXPRESSED IN: 22 plant structures; EXPRESSED DURING: 12 growth stages; CONTAINS InterPro DOMAIN/s: Protein kinase C-like, phorbol ester/diacylglycerol binding (InterPro:IPR002219), Zinc finger, RING-type (InterPro:IPR001841), Zinc finger, PHD-type (InterPro:IPR001965), C…	C1-like | Protein kinase C-like, phorbol ester/diacylglycerol-binding domain | Zinc finger, PHD-type | Zinc finger, RING-type
AT2G32850	EI:2:13935641-13935702:-	0.156092	0.000999001	Protein kinase superfamily protein	Protein kinase superfamily protein; FUNCTIONS IN: protein serine/threonine kinase activity, protein kinase activity, ATP binding; INVOLVED IN: protein amino acid phosphorylation; LOCATED IN: cellular_component unknown; EXPRESSED IN: 22 plant structures; EXPRESSED DURING: 13 growth stages; CONTAINS InterPro DOMAIN/s: Protein kinase, catalytic domain (InterPro:IPR000719), Serine/threonine-protein k…	Protein kinase domain | Protein kinase-like domain | Serine/threonine-protein kinase, active site
AT2G36120	EI:2:15165756-15166153:+	0.100693	0.00599401	Glycine-rich protein family	DEFECTIVELY ORGANIZED TRIBUTARIES 1 (DOT1); INVOLVED IN: cotyledon vascular tissue pattern formation, phloem or xylem histogenesis, leaf vascular tissue pattern formation, leaf development; LOCATED IN: endomembrane system; EXPRESSED IN: 9 plant structures; EXPRESSED DURING: LP.06 six leaves visible, LP.04 four leaves visible, LP.10 ten leaves visible, petal differentiation and expansion stage
AT2G36120	EI:2:15166056-15166153:+	0.126285	0.0044955
AT2G40050	EI:2:16724471-16724659:-	1	0	Cysteine/Histidine-rich C1 domain family protein	Cysteine/Histidine-rich C1 domain family protein; FUNCTIONS IN: zinc ion binding; LOCATED IN: cellular_component unknown; CONTAINS InterPro DOMAIN/s: DC1 (InterPro:IPR004146), C1-like (InterPro:IPR011424); BEST Arabidopsis thaliana protein match is: Cysteine/Histidine-rich C1 domain family protein (TAIR:AT1G61840.1); CONTAINS InterPro DOMAIN/s: DC1 (InterPro:IPR004146), Zinc finger, PHD-type (Int…	C1-like | DC1 | Zinc finger, PHD-type
AT3G18680	EI:3:6429308-6429408:+	0.256384	0	Amino acid kinase family protein	Amino acid kinase family protein; FUNCTIONS IN: uridylate kinase activity, UMP kinase activity; INVOLVED IN: cellular amino acid biosynthetic process, pyrimidine nucleotide biosynthetic process; LOCATED IN: chloroplast; EXPRESSED IN: 23 plant structures; EXPRESSED DURING: 13 growth stages; CONTAINS InterPro DOMAIN/s: Aspartate/glutamate/uridylate kinase (InterPro:IPR001048), Uridylate kinase, bac…	Aspartate/glutamate/uridylate kinase | Uridylate kinase, bacteria
AT3G19330	EI:3:6700222-6700319:+	0.442259	0.00599401	Protein of unknown function (DUF677)	Protein of unknown function (DUF677); FUNCTIONS IN: molecular_function unknown; INVOLVED IN: biological_process unknown; LOCATED IN: plasma membrane; EXPRESSED IN: shoot apex, flower, seed; EXPRESSED DURING: petal differentiation and expansion stage, E expanded cotyledon stage; BEST Arabidopsis thaliana protein match is: Protein of unknown function (DUF677) (TAIR:AT3G19250.1); CONTAINS InterPro D…	Protein of unknown function DUF677
AT3G24515	EI:3:8935984-8936060:-	0.643638	0	ubiquitin-conjugating enzyme 37	ubiquitin-conjugating enzyme 37 (UBC37); FUNCTIONS IN: ubiquitin-protein ligase activity, small conjugating protein ligase activity; INVOLVED IN: regulation of protein metabolic process, post-translational protein modification; EXPRESSED IN: 23 plant structures; EXPRESSED DURING: 14 growth stages; CONTAINS InterPro DOMAIN/s: Ubiquitin-conjugating enzyme/RWD-like (InterPro:IPR016135), Ubiquitin-co…	Ubiquitin-conjugating enzyme, E2 | Ubiquitin-conjugating enzyme, active site | Ubiquitin-conjugating enzyme/RWD-like
AT3G24515	EI:3:8935984-8936064:-	0.643638	0
AT3G27320	EI:3:10090592-10090685:+	0.121831	0.00599401	alpha/beta-Hydrolases superfamily protein	alpha/beta-Hydrolases superfamily protein; FUNCTIONS IN: hydrolase activity; INVOLVED IN: metabolic process; EXPRESSED IN: 22 plant structures; EXPRESSED DURING: 13 growth stages; CONTAINS InterPro DOMAIN/s: Alpha/beta hydrolase fold-3 (InterPro:IPR013094); BEST Arabidopsis thaliana protein match is: carboxyesterase 16 (TAIR:AT5G14310.1)	Alpha/Beta hydrolase fold | Alpha/beta hydrolase fold-3
AT3G27320	EI:3:10090592-10090689:+	0.121831	0.00599401
AT3G43740	EI:3:15644659-15644750:+	0.158561	0.000999001	Leucine-rich repeat (LRR) family protein	Leucine-rich repeat (LRR) family protein; INVOLVED IN: signal transduction; LOCATED IN: endomembrane system; EXPRESSED IN: 22 plant structures; EXPRESSED DURING: 13 growth stages; CONTAINS InterPro DOMAIN/s: Leucine-rich repeat-containing N-terminal domain, type 2 (InterPro:IPR013210), Leucine-rich repeat (InterPro:IPR001611); BEST Arabidopsis thaliana protein match is: Leucine-rich repeat (LRR) …	Leucine rich repeat 4 | Leucine-rich repeat | Leucine-rich repeat-containing N-terminal, type 2
AT3G52260	EI:3:19386125-19386212:-	0.531762	0	Pseudouridine synthase family protein	Pseudouridine synthase family protein; FUNCTIONS IN: pseudouridine synthase activity, RNA binding; INVOLVED IN: pseudouridine synthesis, RNA modification; LOCATED IN: cellular_component unknown; EXPRESSED IN: 21 plant structures; EXPRESSED DURING: 13 growth stages; CONTAINS InterPro DOMAIN/s: Pseudouridine synthase, catalytic domain (InterPro:IPR020103), Pseudouridine synthase, RluC/RluD (InterPr…	Pseudouridine synthase, RluC/RluD, conserved site | Pseudouridine synthase, RsuA/RluB/C/D/E/F | Pseudouridine synthase, catalytic domain | RNA pseudouridine synthase 5 | RNA-binding S4 domain
AT3G53100	EI:3:19685783-19685873:-	-0.221161	0.000499501	GDSL-like Lipase/Acylhydrolase superfamily protein	GDSL-like Lipase/Acylhydrolase superfamily protein; FUNCTIONS IN: hydrolase activity, acting on ester bonds, carboxylesterase activity; INVOLVED IN: lipid metabolic process; LOCATED IN: endomembrane system; EXPRESSED IN: 21 plant structures; EXPRESSED DURING: 13 growth stages; CONTAINS InterPro DOMAIN/s: Lipase, GDSL (InterPro:IPR001087); BEST Arabidopsis thaliana protein match is: GDSL-like Lipa…	Lipase, GDSL | SGNH hydrolase-type esterase domain
AT4G01510	EI:4:642990-643087:+	0.199848	0.0044955	Arv1-like protein	ARV2; CONTAINS InterPro DOMAIN/s: Arv1-like protein (InterPro:IPR007290); BEST Arabidopsis thaliana protein match is: Arv1-like protein (TAIR:AT1G01020.1)	Arv1 protein
AT4G02540	EI:4:1118897-1119007:+	0.142129	0.000499501	Cysteine/Histidine-rich C1 domain family protein	Cysteine/Histidine-rich C1 domain family protein; FUNCTIONS IN: zinc ion binding; INVOLVED IN: biological_process unknown; LOCATED IN: cellular_component unknown; EXPRESSED IN: 22 plant structures; EXPRESSED DURING: 13 growth stages; CONTAINS InterPro DOMAIN/s: DC1 (InterPro:IPR004146), C1-like (InterPro:IPR011424), Zinc finger, PHD-finger (InterPro:IPR019787); BEST Arabidopsis thaliana protein m…	C1-like | DC1 | Zinc finger, PHD-finger | Zinc finger, PHD-type | Zinc finger, RING/FYVE/PHD-type
AT4G11521	EI:4:6985963-6986068:+	0.151127	0.00599401	Receptor-like protein kinase-related family protein	Receptor-like protein kinase-related family protein; LOCATED IN: endomembrane system; CONTAINS InterPro DOMAIN/s: Protein of unknown function DUF26 (InterPro:IPR002902); BEST Arabidopsis thaliana protein match is: cysteine-rich RLK (RECEPTOR-like protein kinase) 34 (TAIR:AT4G11530.1)	Gnk2-homologous domain
AT4G13810	EI:4:8006947-8007057:-	0.331826	0	receptor like protein 47	receptor like protein 47 (RLP47); CONTAINS InterPro DOMAIN/s: Leucine-rich repeat-containing N-terminal domain, type 2 (InterPro:IPR013210), Leucine-rich repeat (InterPro:IPR001611); INVOLVED IN: signal transduction, defense response; BEST Arabidopsis thaliana protein match is: receptor like protein 50 (TAIR:AT4G13920.1); LOCATED IN: endomembrane system; EXPRESSED IN: 7 plant structures; EXPRESSE…	Leucine-rich repeat | Leucine-rich repeat-containing N-terminal, type 2
AT4G13810	EI:4:8006952-8007057:-	0.331826	0
AT4G19500	EI:4:10627381-10627468:+	0.103731	0.00749251	nucleoside-triphosphatases;transmembrane receptors;nucleotide binding;ATP binding	nucleoside-triphosphatases;transmembrane receptors;nucleotide binding;ATP binding; FUNCTIONS IN: transmembrane receptor activity, ATP binding; FUNCTIONS IN: transmembrane receptor activity, nucleoside-triphosphatase activity, nucleotide binding, ATP binding; INVOLVED IN: signal transduction, defense response, apoptosis, innate immune response; LOCATED IN: intrinsic to membrane; EXPRESSED IN: 23 p…	AAA+ ATPase domain | Domain of unknown function DUF640 | Leucine rich repeat 4 | Leucine-rich repeat 3 | NB-ARC | P-loop containing nucleoside triphosphate hydrolase | Toll/interleukin-1 receptor homology (TIR) domain
AT4G23250	EI:4:12162751-12162830:-	0.172081	0.003996	kinases;protein kinases	EMBRYO DEFECTIVE 1290 (EMB1290); FUNCTIONS IN: protein kinase activity, kinase activity; INVOLVED IN: protein amino acid autophosphorylation, embryo development ending in seed dormancy; LOCATED IN: plasma membrane; EXPRESSED IN: stem; CONTAINS InterPro DOMAIN/s: Protein kinase, ATP binding site (InterPro:IPR017441), Serine/threonine-protein kinase domain (InterPro:IPR002290), Protein of unknown f…
AT4G32440	EI:4:15658272-15658397:+	0.107876	0.00699301	Plant Tudor-like RNA-binding protein	Plant Tudor-like RNA-binding protein; FUNCTIONS IN: RNA binding; INVOLVED IN: biological_process unknown; EXPRESSED IN: 21 plant structures; EXPRESSED DURING: 10 growth stages; CONTAINS InterPro DOMAIN/s: ENT (InterPro:IPR005491), Tudor-like, plant (InterPro:IPR014002), Agenet (InterPro:IPR008395); CONTAINS InterPro DOMAIN/s: Tudor-like, plant (InterPro:IPR014002), Agenet (InterPro:IPR008395); CO…	Agenet-like domain | EMSY N-terminal | Tudor-like, plant
AT4G39260	EI:4:18274185-18274267:-	-0.154597	0.0024975	cold, circadian rhythm, and RNA binding 1	cold, circadian rhythm, and RNA binding 1 (CCR1); FUNCTIONS IN: RNA binding, nucleotide binding, nucleic acid binding; INVOLVED IN: response to zinc ion, response to salt stress, response to cold, circadian rhythm, innate immune response; LOCATED IN: nucleolus, cell wall, peroxisome, plasma membrane, chloroplast; EXPRESSED IN: 27 plant structures; EXPRESSED IN: 28 plant structures; EXPRESSED DURI…	Nucleotide-binding, alpha-beta plait | RNA recognition motif domain
AT5G01670	EI:5:252521-252603:+	0.13237	0.000499501	NAD(P)-linked oxidoreductase superfamily protein	NAD(P)-linked oxidoreductase superfamily protein; FUNCTIONS IN: oxidoreductase activity; INVOLVED IN: oxidation reduction; EXPRESSED IN: 18 plant structures; EXPRESSED DURING: 11 growth stages; CONTAINS InterPro DOMAIN/s: Aldo/keto reductase (InterPro:IPR001395), Aldo/keto reductase subgroup (InterPro:IPR020471), Aldo/keto reductase, conserved site (InterPro:IPR018170); BEST Arabidopsis thaliana …	Aldo/keto reductase | Aldo/keto reductase subgroup | Aldo/keto reductase, conserved site | NADP-dependent oxidoreductase domain
AT5G37370	EI:5:14815843-14815938:-	0.176945	0.0024975	PRP38 family protein	ATSRL1; FUNCTIONS IN: binding; INVOLVED IN: response to salt stress, RNA processing; LOCATED IN: cellular_component unknown; EXPRESSED IN: 24 plant structures; EXPRESSED DURING: 15 growth stages; CONTAINS InterPro DOMAIN/s: PRP38 (InterPro:IPR005037)	Pre-mRNA-splicing factor 38 | Pre-mRNA-splicing factor 38, C-terminal
AT5G38250	EI:5:15281516-15281598:-	1	0	Protein kinase family protein	Protein kinase family protein; FUNCTIONS IN: protein serine/threonine kinase activity, protein kinase activity, kinase activity, ATP binding; INVOLVED IN: protein amino acid phosphorylation; LOCATED IN: endomembrane system; CONTAINS InterPro DOMAIN/s: Protein kinase, catalytic domain (InterPro:IPR000719), Serine/threonine-protein kinase domain (InterPro:IPR002290), Serine-threonine/tyrosine-prote…	Protein kinase domain | Protein kinase-like domain | Serine-threonine/tyrosine-protein kinase catalytic domain | Serine/threonine-protein kinase, active site | Wall-associated receptor kinase galacturonan-binding domain
AT5G40490	EI:5:16227076-16227374:+	0.263349	0	RNA-binding (RRM/RBD/RNP motifs) family protein	RNA-binding (RRM/RBD/RNP motifs) family protein; FUNCTIONS IN: RNA binding, nucleotide binding, nucleic acid binding; INVOLVED IN: biological_process unknown; LOCATED IN: cellular_component unknown; EXPRESSED IN: 21 plant structures; EXPRESSED DURING: 13 growth stages; CONTAINS InterPro DOMAIN/s: RNA recognition motif, RNP-1 (InterPro:IPR000504), Nucleotide-binding, alpha-beta plait (InterPro:IPR…	Nucleotide-binding, alpha-beta plait | RNA recognition motif domain
AT5G45310	EI:5:18360629-18360771:-	-0.101487	0.0024975		unknown protein; LOCATED IN: endomembrane system; EXPRESSED IN: stem, inflorescence meristem, root, leaf; EXPRESSED DURING: LP.04 four leaves visible
AT5G46190	EI:5:18723566-18723702:-	0.179233	0.001998	RNA-binding KH domain-containing protein	RNA-binding KH domain-containing protein; FUNCTIONS IN: RNA binding, nucleic acid binding; INVOLVED IN: biological_process unknown; EXPRESSED IN: 22 plant structures; EXPRESSED DURING: 13 growth stages; CONTAINS InterPro DOMAIN/s: K Homology, type 1, subgroup (InterPro:IPR018111), K Homology (InterPro:IPR004087), K Homology, type 1 (InterPro:IPR004088); BEST Arabidopsis thaliana protein match is:…	K Homology domain | K Homology domain, type 1
AT5G46470	EI:5:18844142-18844225:+	0.106755	0.00799201	disease resistance protein (TIR-NBS-LRR class) family	RESISTANT TO P. SYRINGAE 6 (RPS6); FUNCTIONS IN: transmembrane receptor activity, nucleoside-triphosphatase activity, nucleotide binding, ATP binding; INVOLVED IN: defense response to bacterium, defense response; LOCATED IN: intrinsic to membrane; EXPRESSED IN: 22 plant structures; EXPRESSED DURING: 13 growth stages; CONTAINS InterPro DOMAIN/s: ATPase, AAA+ type, core (InterPro:IPR003593), NB-ARC…	AAA+ ATPase domain | Leucine-rich repeat | Leucine-rich repeat 3 | NB-ARC | P-loop containing nucleoside triphosphate hydrolase | Toll/interleukin-1 receptor homology (TIR) domain
AT5G53150	EI:5:21556006-21556094:+	-0.120913	0.0024975	DNAJ heat shock N-terminal domain-containing protein	DNAJ heat shock N-terminal domain-containing protein; FUNCTIONS IN: unfolded protein binding, heat shock protein binding; INVOLVED IN: protein folding; LOCATED IN: cellular_component unknown; EXPRESSED IN: 24 plant structures; EXPRESSED DURING: 15 growth stages; CONTAINS InterPro DOMAIN/s: Molecular chaperone, heat shock protein, Hsp40, DnaJ (InterPro:IPR015609), Heat shock protein DnaJ, N-termin…	DnaJ domain | DnaJ domain, conserved site | Domain of unknown function DUF3444
AT5G66070	EI:5:26422518-26422591:+	-0.138618	0	RING/U-box superfamily protein	RING/U-box superfamily protein; FUNCTIONS IN: zinc ion binding; INVOLVED IN: response to chitin; EXPRESSED IN: 23 plant structures; EXPRESSED DURING: 15 growth stages; CONTAINS InterPro DOMAIN/s: Zinc finger, RING-type (InterPro:IPR001841), Zinc finger, C3HC4 RING-type (InterPro:IPR018957); BEST Arabidopsis thaliana protein match is: NEP-interacting protein 2 (TAIR:AT2G17730.1)	Zinc finger, RING-type | Zinc finger, RING/FYVE/PHD-type

## Sheet: Overlap
		sac3a		prp4ka
Gene ID	Event identifier	dPSI	p-value	dPSI	p-value	description	comp_description	IPR_domain
AT1G66980	EI:1:25000347-25000469:-	0.21566	0	0.16134	0.00749251	suppressor of npr1-1 constitutive 4	suppressor of npr1-1 constitutive 4 (SNC4); CONTAINS InterPro DOMAIN/s: Protein kinase, ATP binding site (InterPro:IPR017441), Serine/threonine-protein kinase domain (InterPro:IPR002290), Serine-threonine/tyrosine-protein kinase (InterPro:IPR001245), Protein kinase-like domain (InterPro:IPR011009), Serine/threonine-protein kinase, active site (InterPro:IPR008271), PLC-like phosphodiesterase, TIM …	Concanavalin A-like lectin/glucanase, subgroup | Glycerophosphoryl diester phosphodiesterase | PLC-like phosphodiesterase, TIM beta/alpha-barrel domain | Protein kinase domain | Protein kinase, ATP binding site | Protein kinase-like domain | Serine-threonine/tyrosine-protein kinase catalytic domain | Serine/threonine-protein kinase, active site
AT1G77080	EI:1:28958663-28958745:+	0.145529	0.0024975	-0.111636	0.00499501	K-box region and MADS-box transcription factor family protein	K-box region and MADS-box transcription factor family protein ; MADS AFFECTING FLOWERING 1 (MAF1); FUNCTIONS IN: sequence-specific DNA binding transcription factor activity; INVOLVED IN: photoperiodism, flowering, negative regulation of flower development, regulation of transcription, DNA-dependent, regulation of flower development; LOCATED IN: nucleus; EXPRESSED IN: 24 plant structures; EXPRESSE…	Transcription factor, K-box | Transcription factor, MADS-box
AT1G79790	EI:1:30017442-30017518:-	0.13205	0.002997	0.215206	0.001998	Haloacid dehalogenase-like hydrolase (HAD) superfamily protein	Haloacid dehalogenase-like hydrolase (HAD) superfamily protein; FUNCTIONS IN: hydrolase activity; LOCATED IN: chloroplast; EXPRESSED IN: 23 plant structures; EXPRESSED DURING: 13 growth stages; CONTAINS InterPro DOMAIN/s: HAD-superfamily hydrolase, subfamily IA, variant 3 (InterPro:IPR006402)	HAD hydrolase, subfamily IA | HAD-like domain
AT3G27320	EI:3:10090592-10090689:+	0.126352	0.00549451	0.121831	0.00599401	alpha/beta-Hydrolases superfamily protein	alpha/beta-Hydrolases superfamily protein; FUNCTIONS IN: hydrolase activity; INVOLVED IN: metabolic process; EXPRESSED IN: 22 plant structures; EXPRESSED DURING: 13 growth stages; CONTAINS InterPro DOMAIN/s: Alpha/beta hydrolase fold-3 (InterPro:IPR013094); BEST Arabidopsis thaliana protein match is: carboxyesterase 16 (TAIR:AT5G14310.1)	Alpha/Beta hydrolase fold | Alpha/beta hydrolase fold-3
AT3G27320	EI:3:10090592-10090685:+	0.126352	0.00549451	0.121831	0.00599401
AT4G19500	EI:4:10627381-10627468:+	0.127136	0.00799201	0.103731	0.00749251	nucleoside-triphosphatases;transmembrane receptors;nucleotide binding;ATP binding	nucleoside-triphosphatases;transmembrane receptors;nucleotide binding;ATP binding; FUNCTIONS IN: transmembrane receptor activity, ATP binding; FUNCTIONS IN: transmembrane receptor activity, nucleoside-triphosphatase activity, nucleotide binding, ATP binding; INVOLVED IN: signal transduction, defense response, apoptosis, innate immune response; LOCATED IN: intrinsic to membrane; EXPRESSED IN: 23 p…	AAA+ ATPase domain | Domain of unknown function DUF640 | Leucine rich repeat 4 | Leucine-rich repeat 3 | NB-ARC | P-loop containing nucleoside triphosphate hydrolase | Toll/interleukin-1 receptor homology (TIR) domain
AT4G23250	EI:4:12162751-12162830:-	0.348251	0	0.172081	0.003996	kinases;protein kinases	EMBRYO DEFECTIVE 1290 (EMB1290); FUNCTIONS IN: protein kinase activity, kinase activity; INVOLVED IN: protein amino acid autophosphorylation, embryo development ending in seed dormancy; LOCATED IN: plasma membrane; EXPRESSED IN: stem; CONTAINS InterPro DOMAIN/s: Protein kinase, ATP binding site (InterPro:IPR017441), Serine/threonine-protein kinase domain (InterPro:IPR002290), Protein of unknown f…
AT5G46470	EI:5:18844142-18844225:+	0.16129	0.0024975	0.106755	0.00799201	disease resistance protein (TIR-NBS-LRR class) family	RESISTANT TO P. SYRINGAE 6 (RPS6); FUNCTIONS IN: transmembrane receptor activity, nucleoside-triphosphatase activity, nucleotide binding, ATP binding; INVOLVED IN: defense response to bacterium, defense response; LOCATED IN: intrinsic to membrane; EXPRESSED IN: 22 plant structures; EXPRESSED DURING: 13 growth stages; CONTAINS InterPro DOMAIN/s: ATPase, AAA+ type, core (InterPro:IPR003593), NB-ARC…	AAA+ ATPase domain | Leucine-rich repeat | Leucine-rich repeat 3 | NB-ARC | P-loop containing nucleoside triphosphate hydrolase | Toll/interleukin-1 receptor homology (TIR) domain
